# Supplementary material for: Potential RNA-dependent RNA polymerase inhibitors as prospective therapeutics against SARS-CoV-2
Source: PubMed Central journal article supplement (PMC7451031; doi:10.1099/jmm.0.001203), 2020-05-29
Supplement: jmm-69-864-s001.pdf [file jmm-69-864-s001.pdf]

## Supplementary material

**Fig S1. SARS-CoV-2 strain comparisons. Heatmaps showing pairwise sequence of SARS-CoV-2 sequences from GenBank.**

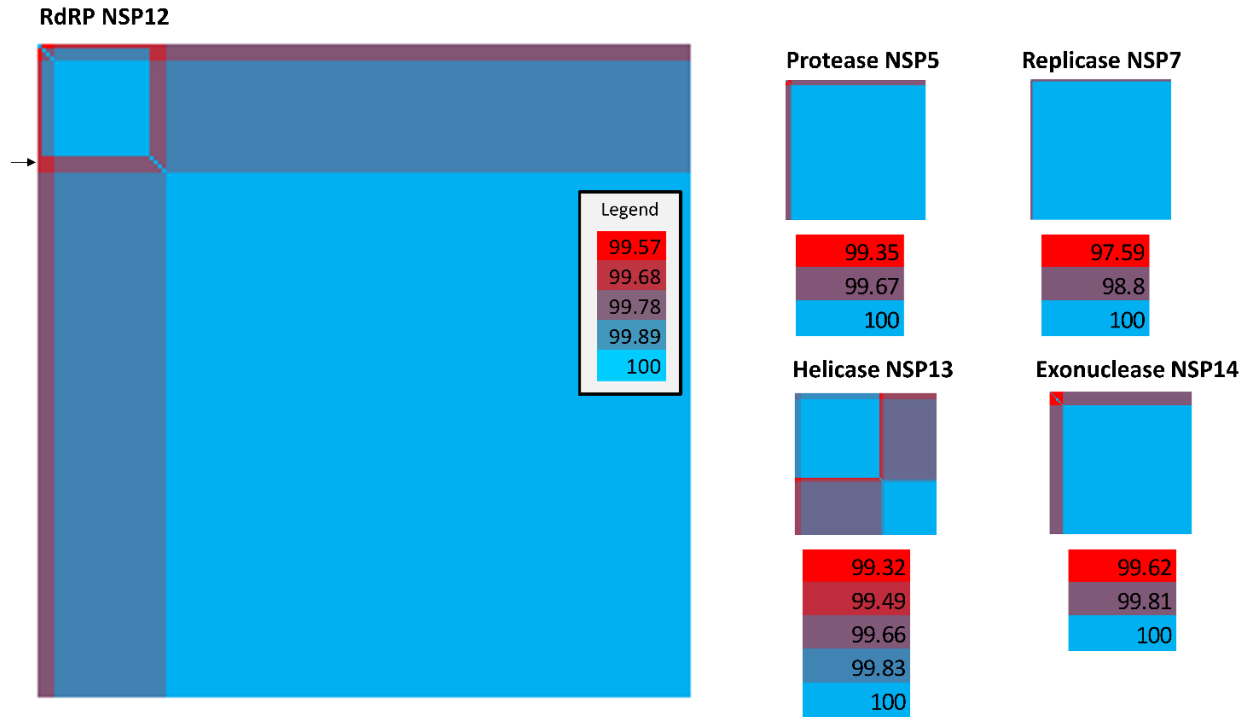

As of 4/09/2020, GenBank had 164 sequences for the RdRP from SARS-CoV-2 with at least 95% query cover to the RdRP region of the reference sequence from SARS-CoV-2 (YP\_009724389.1, range 4398-5324). Sequences with X characters were excluded from the analysis.

The heatmaps above show a comparison of percent sequence identity for the remaining 157 RdRP sequences based on the symmetrical percent identity matrix from a multiple sequence alignment by Muscle [1] from EBI [2]. The color code is shown in the insert.

The target motifs are conserved with one exception in target motif 5 where there is an A to S substitution in the 5<sup>th</sup> position of the motif. The sequence with this substitution (accession number BCB97890.1) was isolated in Japan and its location in the heatmap is marked by the black arrow.

Similarly, for NSP5, 211 sequences without X were available in GenBank. Both targets were 100% conserved.

NSP7, 214 sequences without X were available in GenBank. Both targets were 100% conserved.

NSP13, 162 sequences without X were available in GenBank. Three targets were 100% conserved. Two sequences had a substitution in the 4<sup>th</sup> position of target 2 (P to S).

NSP14, 164 sequences without X were available in GenBank. Three targets were 100% conserved but target 3 had an amino acid substitution in the 2<sup>nd</sup> position (A to T) in one sequence.

**Fig. S2.** Sequence comparison of SARS-CoV based on PDB id 6NUR [3] to SARS-CoV-2. The part of NSP12 sequence from SARS-CoV included in PDB id 6NUR is 96% identical to the corresponding sequence from SARS-CoV-2 according to BLAST. The target regions are colored by motif.

**BLAST alignment:**

**Query:** 6NUR (seqes portion)

**Subject:** orf1ab polyprotein [Severe acute respiratory syndrome coronavirus 2]

**Sequence ID:** [YP\\_009724389.1](#) Length: 7096

Range 1: 4509 to 5311

**Alignment statistics for match #1**

| Score           | Expect | Method                                                                           | Identities   | Positives    | Gaps       |
|-----------------|--------|----------------------------------------------------------------------------------|--------------|--------------|------------|
| 1625 bits(4207) | 0.0    | Compositional matrix adjust.                                                     | 769/803(96%) | 781/803(97%) | 10/803(1%) |
| Query 1         |        | QRLTKYTMADLVYALRHFDEGNCDTLKEILVITYNCCDDDYFNKKDWYDFVENPDILRVYA                    | 60           |              |            |
| Sbjct 4509      |        | QRLTKYTMADLVYALRHFDEGNCDTLKEILVITYNCCDDDYFNKKDWYDFVENPDILRVYA                    | 4568         |              |            |
| Query 61        |        | NLGERVRQSLKKTQVFCDAMRDAGIVGVLTL <b>LDNQDLNGN</b> WY <b>DFGDF</b> VQVAPGCGVPIVDS  | 120          |              |            |
| Sbjct 4569      |        | NLGERVRQ+LLKTVQFCDAMR+AGIVGVLTL <b>LDNQDLNGN</b> WYDFGDF+Q PG GVP+VDS            | 4628         |              |            |
| Query 121       |        | YSSLMPILTLTRALAAESHMDADLAKPLIKWDLKLYDFTEERLCLFDRYFKYWDQTYHP                      | 180          |              |            |
| Sbjct 4629      |        | YSSLMPILTLTRAL AESH+D DL KP IKWDLKLYDFTEERL L FDRYFKYWDQTYHP                     | 4688         |              |            |
| Query 181       |        | NCINCLDDRCILHCANFNVLFSVFPPTSFGPLVRKIFVDGVPFVSTGYHFRELGVVHN                       | 240          |              |            |
| Sbjct 4689      |        | NC+NCLDDRCILHCANFNVLFSVFPPTSFGPLVRKIFVDGVPFVSTGYHFRELGVVHN                       | 4748         |              |            |
| Query 241       |        | QDVNLHSSRSLSFKELLVYAADPAMHAASGNLLLDKRTTCFSVAALTNNVAFQTVKPGNFN                    | 300          |              |            |
| Sbjct 4749      |        | QDVNLHSSRSLSFKELLVYAADPAMHAASGNLLLDKRTTCFSVAALTNNVAFQTVKPGNFN                    | 4808         |              |            |
| Query 301       |        | KDFYDFAVSKGFFKEGSSVELKHFFFAQDGNAAISDYDYRYNLPMTCDIRQLLFVVEVV                      | 360          |              |            |
| Sbjct 4809      |        | KDFYDFAVSKGFFKEGSSVELKHFFFAQDGNAAISDYDYRYNLPMTCDIRQLLFVVEVV                      | 4868         |              |            |
| Query 361       |        | DKYFCYDGGCINANQVIVNNL <b>DKSAG</b> FPFNKWKARLYYDSMSYEDQDALFAYTKRNV I             | 420          |              |            |
| Sbjct 4869      |        | DKYFCYDGGCINANQVIVNNL <b>DKSAG</b> FPFNKWKARLYYDSMSYEDQDALFAYTKRNV I             | 4928         |              |            |
| Query 421       |        | PTITQMNLKYAISAKNRARTVAGVSI <b>CTMTNRQ</b> FHQKLLKLSIAATRGA TVVIGTSK FYG          | 480          |              |            |
| Sbjct 4929      |        | PTITQMNLKYAISAKNRARTVAGVSI <b>CTMTNRQ</b> FHQKLLKLSIAATRGA TVVIGTSK FYG          | 4988         |              |            |
| Query 481       |        | GWHNMLKTVYSDVETPHLMGWDPKCDRAMPNMLRIMASLVLARKHNTCCNLSHRFYRLA                      | 540          |              |            |
| Sbjct 4989      |        | GWHNMLKTVYSDVE PHLMGWDPKCDRAMPNMLRIMASLVLARKH TCC+LSHRFYRLA                      | 5048         |              |            |
| Query 541       |        | <b>NECAQVL</b> SEMVMCGGSLYVKP <b>GGTSSGD</b> ATTAYANSVFNICQAVTANVNALLSTDGNKIA    | 600          |              |            |
| Sbjct 5049      |        | <b>NECAQVL</b> SEMVMCGGSLYVKP <b>GGTSSGD</b> ATTAYANSVFNICQAVTANVNALLSTDGNKIA    | 5108         |              |            |
| Query 601       |        | DKYVRNLQHRLYECLYRNRDVEHDFVDFYAYLRKHFSMMILSDDAVVCYNSNYAAQGLV                      | 660          |              |            |
| Sbjct 5109      |        | DKYVRNLQHRLYECLYRNRDVD +FV+EFYAYLRKHFSMMILSDDAVVC+NS YA+QGLV                     | 5168         |              |            |
| Query 661       |        | ASIKNFKAVLYYQNNVFMSEAKCWTETDLTKGPHEFCSQHTMLVKQGDYVYLP <b>YDPDSR</b>              | 720          |              |            |
| Sbjct 5169      |        | ASIKNFK+VLYYQNNVFMSEAKCWTETDLTKGPHEFCSQHTMLVKQGDYVYLP <b>YDPDSR</b>              | 5228         |              |            |
| Query 721       |        | ILGAGCFVDDIV <b>KTDGT</b> LMIERFVSLAIDAY <b>PLTK</b> HPNQEYADV FHLYLQYIRKLDHDEL- | 779          |              |            |
| Sbjct 5229      |        | ILGAGCFVDDIV <b>KTDGT</b> LMIERFVSLAIDAY <b>PLTK</b> HPNQEYADV FHLYLQYIRKLDHDEL  | 5288         |              |            |
| Query 780       |        | -----MLTNDNTSRYWEPE 793                                                          |              |              |            |
|                 |        | MLTNDNTSRYWEPE                                                                   |              |              |            |
| Sbjct 5289      |        | GHMLDMYSVMLTNDNTSRYWEPE 5311                                                     |              |              |            |

## References

1. **Edgar RC.** MUSCLE: a multiple sequence alignment method with reduced time and space complexity. *BMC Bioinformatics* 2004;5:113.
2. **Madeira F, Park YM, Lee J, Buso N, Gur T, et al.** The EMBL-EBI search and sequence analysis tools APIs in 2019. *Nucleic Acids Res.* Epub ahead of print 12 April 2019. DOI: 10.1093/nar/gkz268.
3. **Kirchdoerfer RN, Ward AB.** Structure of the SARS-CoV nsp12 polymerase bound to nsp7 and nsp8 co-factors. *Nat Commun*;10. Epub ahead of print 1 December 2019. DOI: 10.1038/s41467-019-10280-3.
